# Supplementary material for: NO● Represses the Oxygenation of Arachidonoyl PE by 15LOX/PEBP1: Mechanism and Role in Ferroptosis
Source: MDPI journal article supplement (doi:10.3390/ijms22105253), 2021-05-17
Supplement: s1 [file s1]

# Supplementary Material for

## **NO• represses the oxygenation of arachidonoyl PE by 15LOX/PEBP1: Mechanism and role in ferroptosis**

**Karolina Mikulska-Ruminska<sup>1,2\*</sup>, Tamil S. Anthonymuthu<sup>4</sup>, Anastasia Levkina<sup>3,9</sup>, Indira H. Shrivastava<sup>1,3</sup>, Alexandr A. Kapralov<sup>3</sup>, Hülya Bayır<sup>3,4</sup>, Valerian E. Kagan<sup>3,5,6,7,8†\*</sup>, Ivet Bahar<sup>1†\*</sup>**

<sup>1</sup> Department of Computational and Systems Biology, School of Medicine, University of Pittsburgh, Pennsylvania 15260, USA

<sup>2</sup> Institute of Physics, Faculty of Physics, Astronomy and Informatics, Nicolaus Copernicus University in Toruń, Grudziadzka 5, 87-100 Toruń, Poland

<sup>3</sup> Department of Environmental and Occupational Health and Center for Free Radical and Antioxidant Health University of Pittsburgh, Pittsburgh, Pennsylvania 15260, United States

<sup>4</sup> Department of Critical Care Medicine, Safar Center for Resuscitation Research, Children's Neuroscience Institute, Children's Hospital of Pittsburgh, University of Pittsburgh, Pittsburgh, Pennsylvania 15260, USA

<sup>5</sup> Department of Radiation Oncology, <sup>6</sup>Department of Chemistry, and <sup>7</sup>Department of Pharmacology and Chemical Biology, University of Pittsburgh, Pittsburgh, Pennsylvania 15260, USA

<sup>8</sup> Institute of Regenerative Medicine, IM Sechenov Moscow State Medical University, Moscow 119048, Russia

† - I.B. and V.E.K. contributed equally to this work

\* Correspondence: karolamik@fizyka.umk.pl (K.M-R); kagan@pitt.edu (V.E.K.); bahar@pitt.edu (I.B.)

## Supplementary Figures

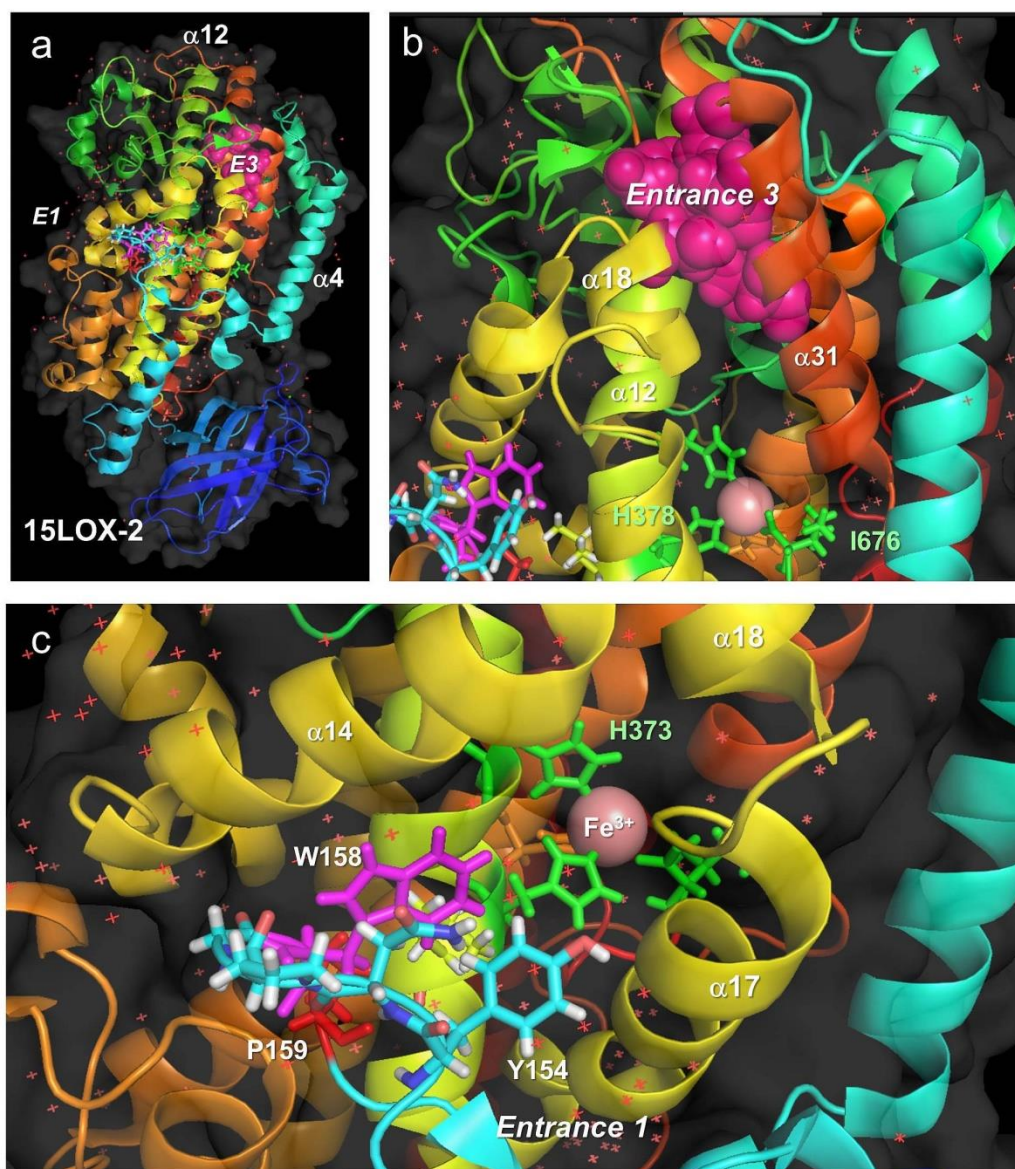

**Figure S1.** Location of the two entrances *E1* and *E2* of 15LOX-2 that enable access of  $\text{O}_2$  and  $\text{NO}^\bullet$  to the catalytic site. **(a)** Overall structure (based on the structure resolved [1] for 15LOX (PDB: 4NRE), color coded by chain from *blue* (N-terminus) to *red* (C-terminus)). The protein is rotated by  $90^\circ$  with respect to the view shown in [Figure 2a](#) to enable a clearer view of the two entrances. The first helical portion ( $\alpha 12$ ; *green*) of the long helix  $\alpha 12$ -14 that spans the overall structure is labeled. Its other portions (*green to yellow*) making contacts with either entrance and lining the catalytic site are labeled in other panels. **(b)** Entrance 3 residues (S430, S573, P595, A599 and V603), shown in *hot red space-filling representation* located between helices  $\alpha 18$  and  $\alpha 31$

(see [Figure S2](#)), providing access to the catalytic residues shown in *green sticks*. Note that one of the catalytic residues (H553, colored *orange*) is not visible from this perspective, being located behind the  $\text{Fe}^{3+}$  ion (*pink sphere*); **(c)** Close-up view of the loop residues Y154-P159 (shown in *sticks*) that form the entrance 1 (*E1*). Note that Y154 (*cyan*, with side chain hydroxyl O in *red*) and W158 (*magenta*) may play a gating role upon rotational isomerization. P159 does not directly participate in the porous region but is a highly conserved residues that presumably provides a scaffold for restraining the loop motion. See also [Figure S3](#).

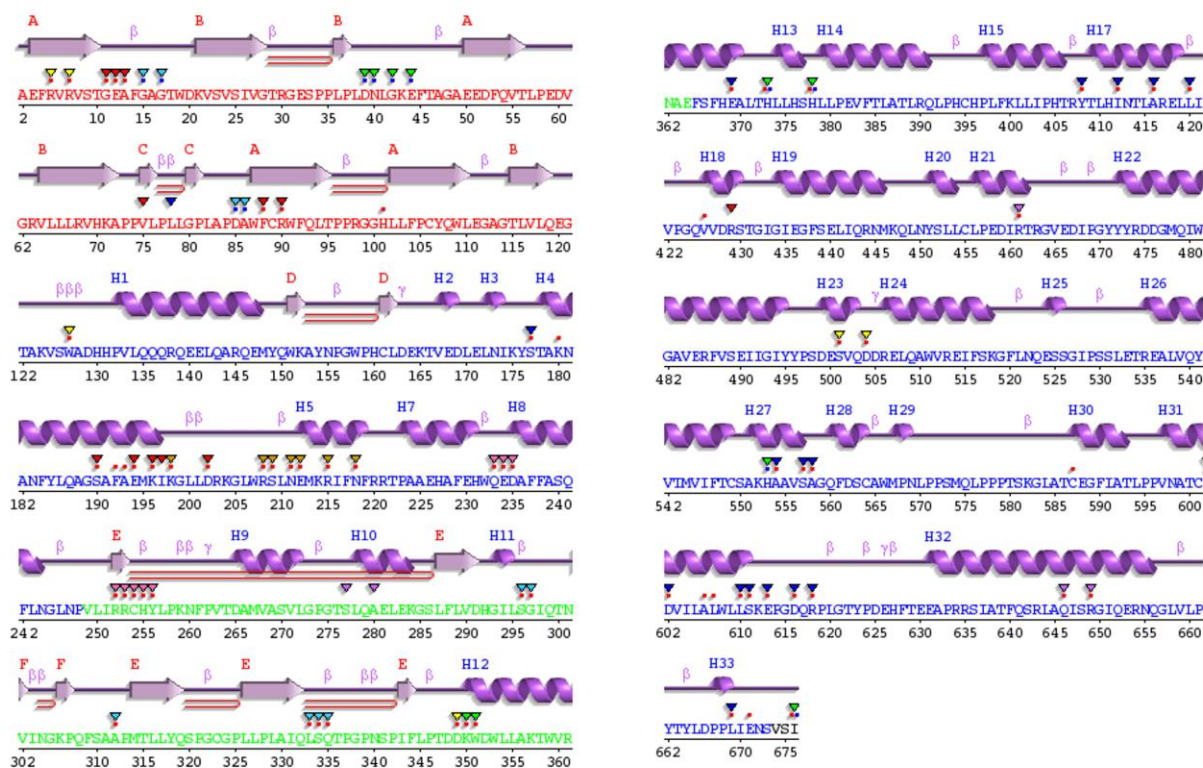

**Figure S2. Secondary structure of 15LOX-2.** The diagram displays the ranges of amino acids (from PDBsum [2] for 4NRE) corresponding to the structural elements referred to in the text, figures, and [Table S2](#). Residue numbers corresponding to the N-terminal domain, composed of  $\beta$ -strands, are written in red.



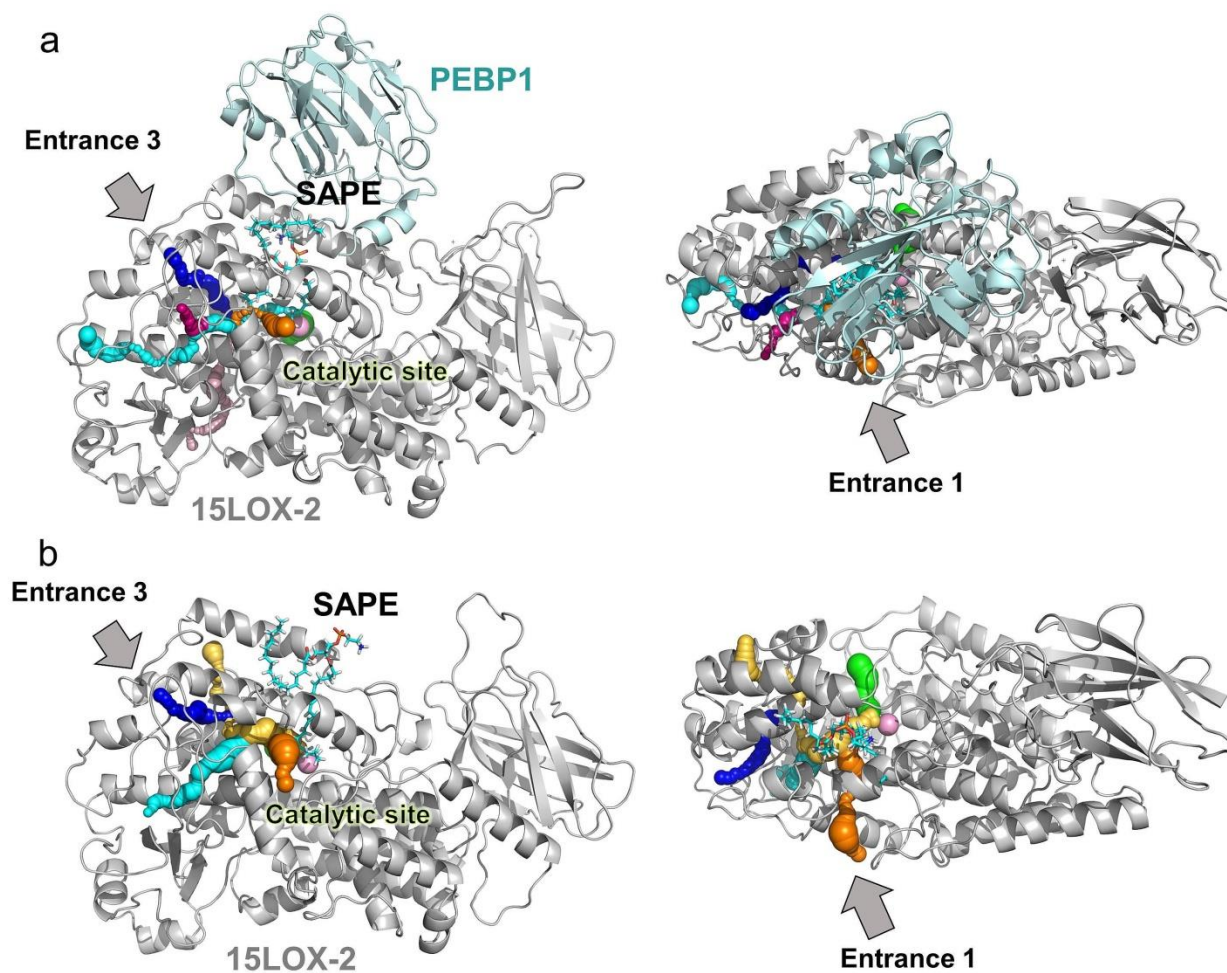

**Figure S3. Additional pores/tunnels leading to the catalytic site.** Cavities and interior surfaces that lead to the catalytic site of 15LOX-2 were detected in (a) 15LOX-2/PEBP1/SAPE and (b) 15LOX-2/AA using Caver [3]. These pores/tunnels are shown in different colors (*cyan, orange, blue, green and yellow*), surface representation. SAPE atoms are shown as *sticks* with carbons in *cyan* and oxygens in *red*. Entrances 1 and 3 are pointed by *black arrows*, respectively. Diagrams on the *right* are the views from *top*.

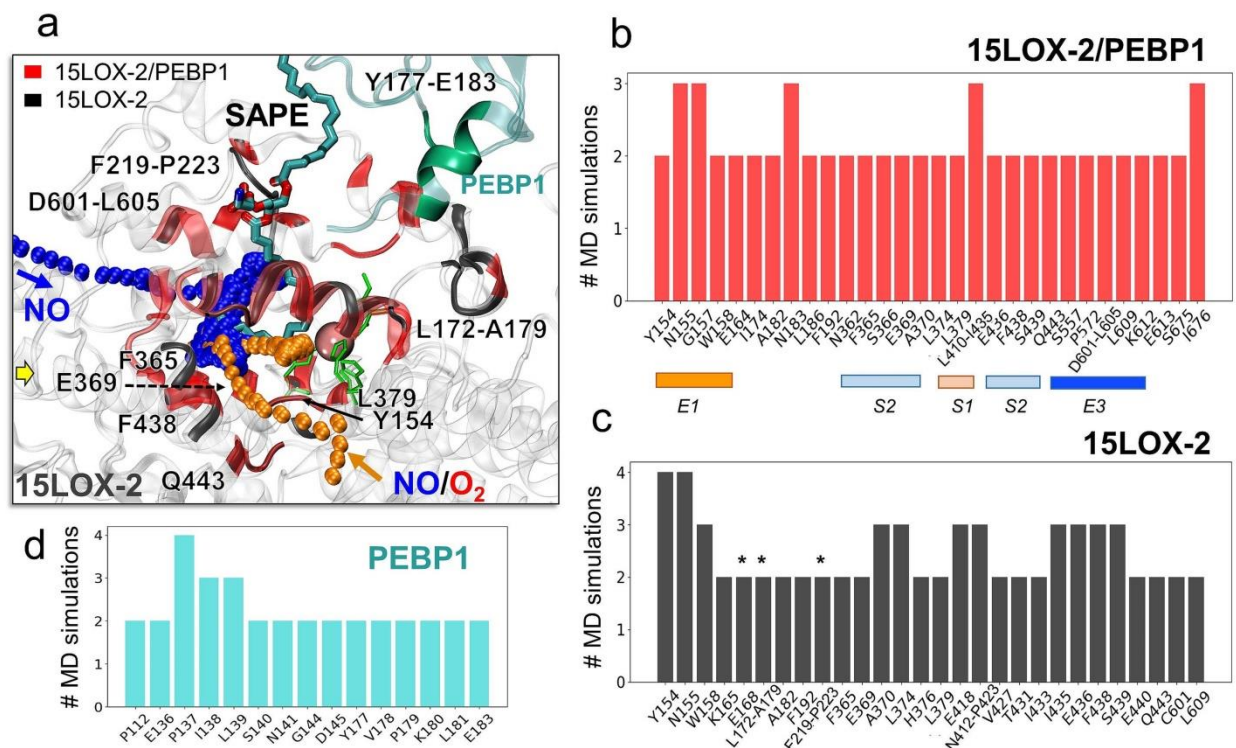

**Figure S4. Close-up view of contacts between 15LOX-2 residues and O<sub>2</sub>/NO• molecules. (a)** The 15LOX segments that exhibit the most frequent interactions with NO• and O<sub>2</sub> molecules are displayed in *red/green* for 15LOX-2/PEBP1/SAPE and in *black* for 15LOX-2/SAPE. Catalytic residues are displayed in *green sticks*. O<sub>2</sub> and NO• pathways to the catalytic site through Entrance 1 (*orange*) and Entrance 3 (*blue*) are shown. *Yellow arrow* points to  $\alpha$ 12-14. **(b-c)** Histograms of 15LOX-2 residues which make contacts with O<sub>2</sub>/NO• in the presence **(b)** or absence **(c)** of PEBP1. The horizontal bars between the panels indicate the residues located at the entrances *E1* and *E3*, or sites *S1* and *S2*. An O<sub>2</sub> or NO• molecule is assumed to make a contact with 15LOX-2 if it stays within 3.5 Å of any 15LOX-2 atom for at least 3 ns during the course of a 150 ns run. Residues observed to make contacts only in one run are not displayed. *Black stars* in panel *c* denote the regions that are not occupied by NO• and O<sub>2</sub> in the presence of PEBP1. **(d)** PEBP1 residues making extended contacts with NO• and O<sub>2</sub> in at least two independent runs.

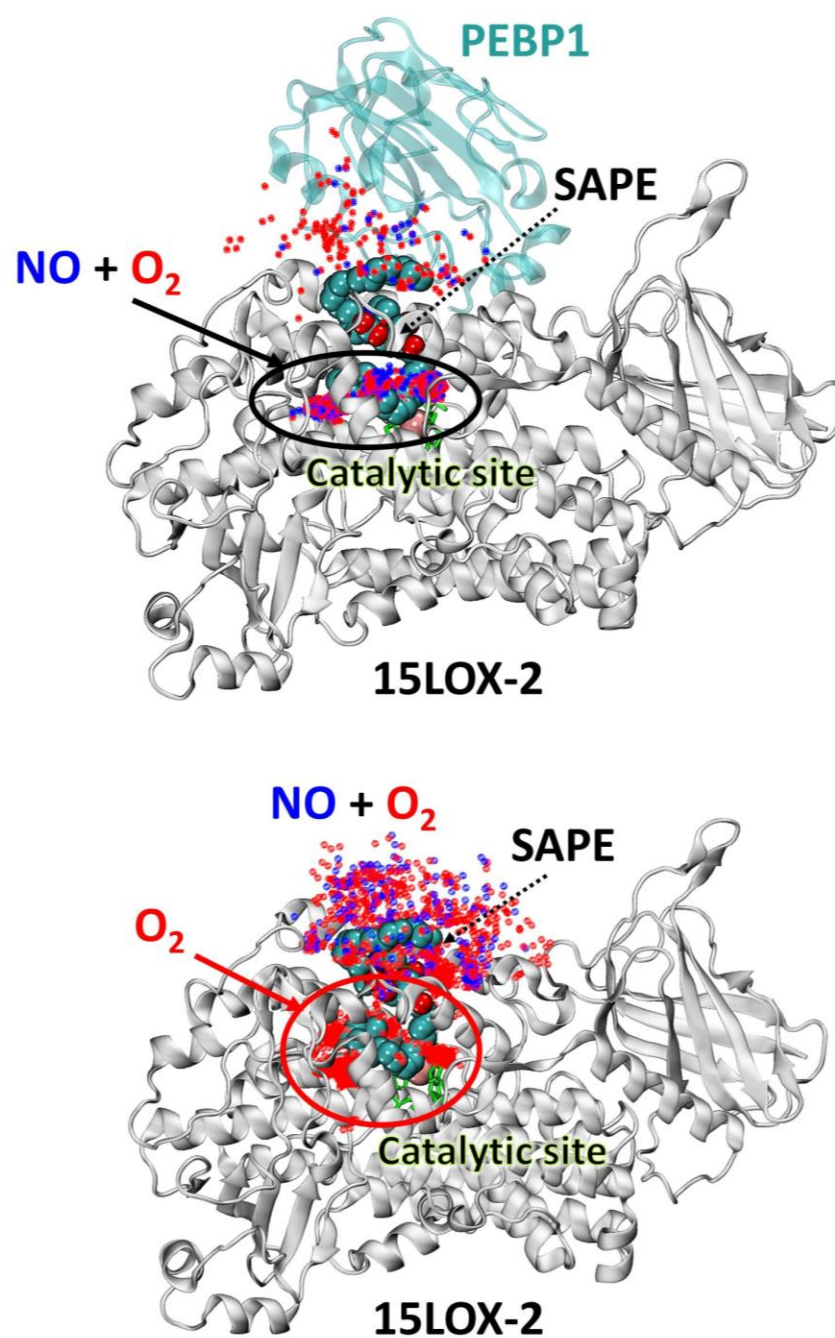

**Figure S5.** Same results as Figure 4a-b, reproduced by an independent run. The repeated pattern shows the robustness of the preferential binding positions of O<sub>2</sub> and NO• in the presence (*top panel*) and absence (*bottom panel*) of PEBP1 complexation.

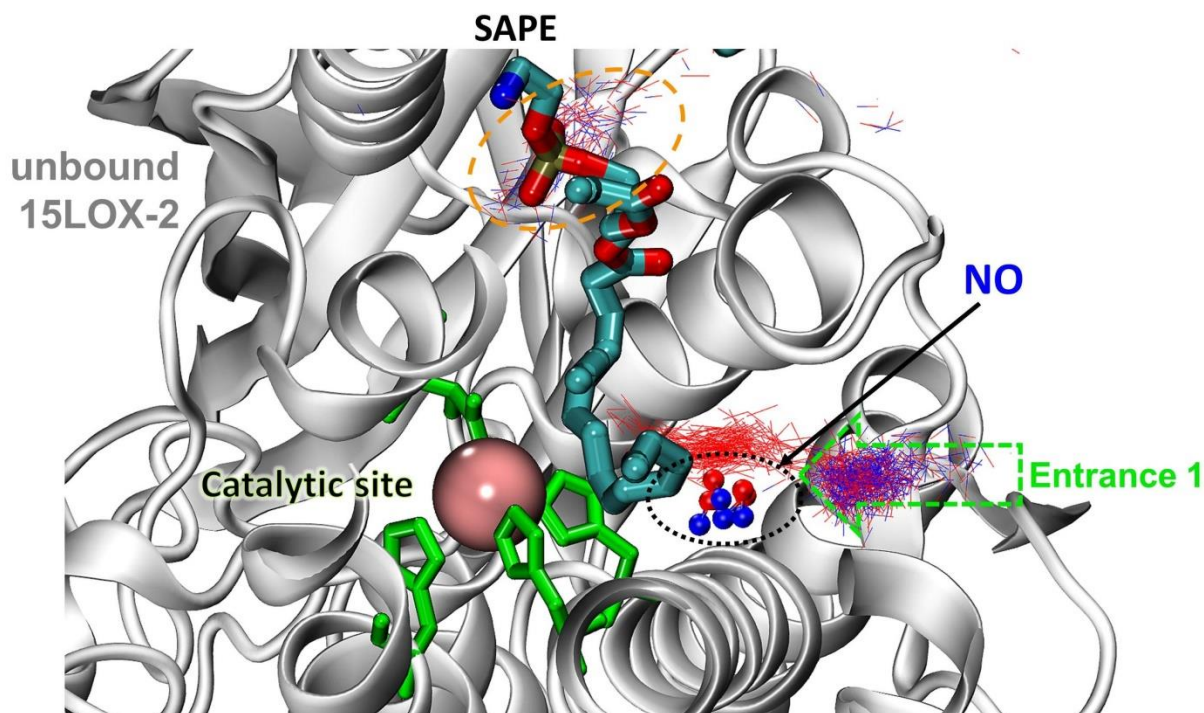

**Figure S6.** 15LOX-2/SAPE complex and its interactions with O<sub>2</sub> and NO• molecules observed in MD simulations with higher concentration of NO• molecules. The positions of the O<sub>2</sub>/NO• molecules within 7 Å of SAPE observed in multiple snapshots are shown in red/blue dots. Both small molecules are observed to visit the catalytic site. The cloud of small dots shows where and how long (more dots) O<sub>2</sub> and NO• travelled and/or remained bound during simulations. Orange sphere denote accumulation of NO• molecules near the loop L172-A179 (see also Figure 4c).



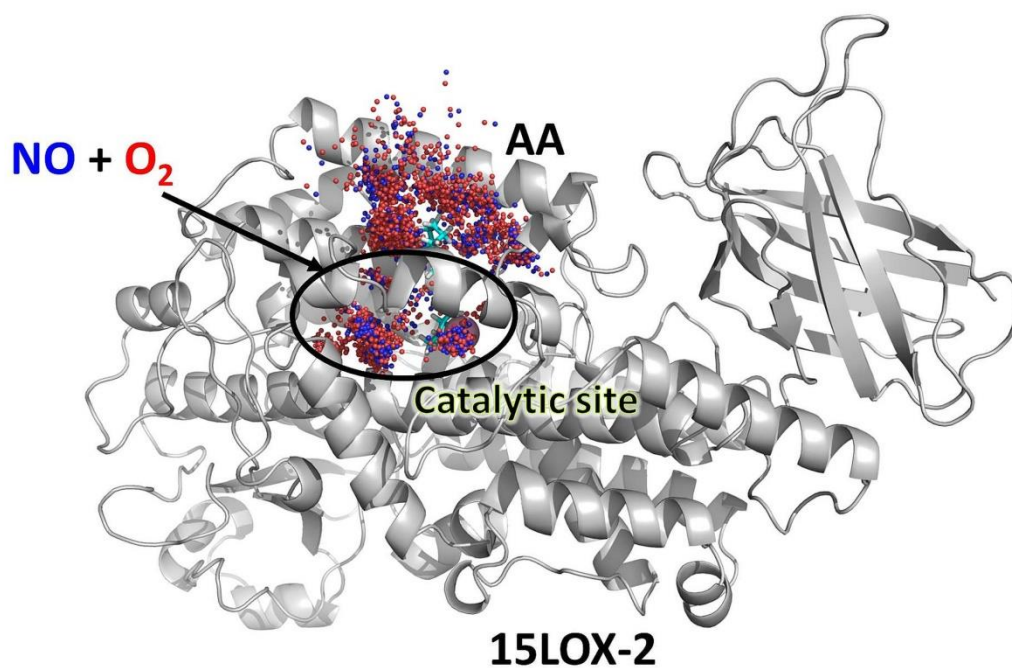

**Figure S7.** 15LOX-2/AA complex and its interactions with O<sub>2</sub> and NO• molecules observed in MD simulations. The positions of the O<sub>2</sub>/NO• molecules within 7 Å of the substrate (AA or ETE) observed in multiple snapshots are shown in *red/blue dots*. Both small molecules are observed to visit the catalytic site.



## Supplementary Tables

**Table S1.** Summary of the simulated systems, compositions, and durations.

| Simulation system<br>(substrate/ligands in<br>addition to 15LOX-2) | # of H <sub>2</sub> O<br>molecules | #of<br>O <sub>2</sub> | # of NO<br>molecules | Total #<br>of<br>Atoms | # of<br>Runs | Total<br>Time per<br>run (ns) | Total<br>simulation<br>duration (ns) |
|--------------------------------------------------------------------|------------------------------------|-----------------------|----------------------|------------------------|--------------|-------------------------------|--------------------------------------|
| + AA+O <sub>2</sub>                                                | 15 266                             | 5                     | -                    | 56 611                 | 2            | 150                           | 300                                  |
| + AA+NO+O <sub>2</sub>                                             | 21 249                             | 5                     | 5                    | 56 570                 | 3            | 150                           | 450                                  |
| + SAPE+O <sub>2</sub>                                              | 15 251                             | 5                     | -                    | 56 643                 | 2            | 150                           | 300                                  |
| + SAPE+O <sub>2</sub> +NO                                          | 15 235                             | 5                     | 5                    | 56 606                 | 2            | 150                           | 300                                  |
| + PEBP1+SAPE+O <sub>2</sub>                                        | 20 977                             | 5                     | -                    | 76 730                 | 2            | 150                           | 300                                  |
| PEBP1+SAPE+O <sub>2</sub> +NO                                      | 20 960                             | 5                     | 5                    | 76 707                 | 5            | 150                           | 750                                  |
| + SAPE+O <sub>2</sub> +NO                                          | 15 674                             | 15                    | 5                    | 57 944                 | 2            | 150                           | 300                                  |
| PEBP1+SAPE+O <sub>2</sub> +NO                                      | 21 214                             | 15                    | 5                    | 77 491                 | 2            | 150                           | 300                                  |
| + SAPE+O <sub>2</sub> +NO                                          | 15 674                             | 5                     | 15                   | 57 944                 | 2            | 150                           | 300                                  |
| PEBP1+SAPE+O <sub>2</sub> +NO                                      | 20 926                             | 5                     | 15                   | 76 625                 | 2            | 150                           | 300                                  |

**Table S2.** Key residues in 15LOX-2 that play a role in regulation of lipid peroxidation<sup>1, 2</sup>.

| Role of residue                                                                                                                                                                                            | 15LOX-2 | 15LOX-1 | 5LOX | LOX12 |
|------------------------------------------------------------------------------------------------------------------------------------------------------------------------------------------------------------|---------|---------|------|-------|
| Catalytic residues                                                                                                                                                                                         | H378    | H365    | H373 | H365  |
|                                                                                                                                                                                                            | H373    | H360    | H368 | H360  |
|                                                                                                                                                                                                            | H553    | H540    | H551 | H540  |
|                                                                                                                                                                                                            | I676    | I662    | I674 | I663  |
| Entrance 1 ( <i>E1</i> ) to a pore on 15LOX surface (Figure 1b), which permits O <sub>2</sub> <sup>•</sup> (and NO <sup>•</sup> ) to have access to the catalytic site though sites <i>S1</i> or <i>S2</i> | Y154    | W144    | W148 | W144  |
|                                                                                                                                                                                                            | N155    | K145    | N149 | K145  |
|                                                                                                                                                                                                            | G157    | G147    | G151 | G147  |
|                                                                                                                                                                                                            | W158    | L148    | F152 | L148  |
|                                                                                                                                                                                                            | I421    | V408    | I416 | I408  |
|                                                                                                                                                                                                            | I435    | G422    | G430 | G422  |
|                                                                                                                                                                                                            | F438    | H425    | H433 | H425  |
|                                                                                                                                                                                                            | S439    | V426    | V434 | V426  |
| Binding site <i>S1</i> (Figure 1c) for small molecule binding after entry from <i>E1</i>                                                                                                                   | N413    | N400    | N408 | N400  |
|                                                                                                                                                                                                            | A416    | A403    | A411 | A403  |
|                                                                                                                                                                                                            | R417    | R404    | R412 | R404  |
|                                                                                                                                                                                                            | L374    | L361    | L369 | L361  |
|                                                                                                                                                                                                            | L379    | L366    | L374 | L366  |
| Binding site <i>S2</i> (Figure 1c) for small molecules (O <sub>2</sub> <sup>•</sup> and NO <sup>•</sup> ) entering through either <i>E1</i> or <i>E3</i>                                                   | I433    | T420    | T428 | T420  |
|                                                                                                                                                                                                            | F365    | F352    | F360 | F352  |
|                                                                                                                                                                                                            | T431    | M418    | N426 | V418  |
|                                                                                                                                                                                                            | V427    | F414    | F422 | F414  |
|                                                                                                                                                                                                            | E369    | E356    | Q364 | E365  |
| Entrance 3 ( <i>E3</i> ) residues (Figure 1d)                                                                                                                                                              | S573    | T560    | T571 | T560  |
|                                                                                                                                                                                                            | P595    | P581    | P593 | P582  |
|                                                                                                                                                                                                            | A599    | Q585    | R597 | Q586  |
|                                                                                                                                                                                                            | V603    | Q589    | H603 | Q590  |
|                                                                                                                                                                                                            | S430    | I417    | A425 | A417  |
| Cluster 1 of hydrophobic residues bridging between <i>E3</i> and catalytic site (exhibiting extended interactions with NO <sup>•</sup> /O <sub>2</sub> <sup>•</sup> )                                      | I216    | I206    | I211 | I206  |
|                                                                                                                                                                                                            | I604    | M590    | L602 | M591  |
|                                                                                                                                                                                                            | F561    | L548    | Y599 | L548  |
|                                                                                                                                                                                                            | C564    | Y551    | C562 | Y551  |
|                                                                                                                                                                                                            | A565    | S552    | S563 | A552  |
| Cluster 2 of hydrophobic residues bridging between and catalytic site                                                                                                                                      | L607    | T593    | V605 | S594  |
|                                                                                                                                                                                                            | L610    | L596    | L608 | L597  |
|                                                                                                                                                                                                            | L420    | L407    | L415 | L407  |
|                                                                                                                                                                                                            | V426    | I413    | L421 | I413  |
|                                                                                                                                                                                                            | V427    | F414    | F422 | F414  |
| Cluster 3 of residues bridging between <i>E3</i> and catalytic site, also merging with site <i>S2</i>                                                                                                      | H368    | H355    | H363 | H355  |
|                                                                                                                                                                                                            | L570    | A577    | A568 | A557  |
|                                                                                                                                                                                                            | L246    | A236    | C241 | A236  |
|                                                                                                                                                                                                            | E364    | D351    | D359 | D351  |
| Residues which coordinate the sn-2 (ETE) chain of SAPE near the catalytic site of 15LOX (Figure 6c)                                                                                                        | L610    | L596    | L608 | L597  |
|                                                                                                                                                                                                            | L420    | L407    | L415 | L407  |
|                                                                                                                                                                                                            | N413    | N400    | N408 | N400  |
|                                                                                                                                                                                                            | L374    | L361    | L369 | L361  |
| Residues that exhibit frequent interactions with SAPE (Figure 5)                                                                                                                                           | G189    | A179    | S183 | K179  |
|                                                                                                                                                                                                            | A416    | A403    | A411 | A403  |

|                                                                      |           |           |           |           |
|----------------------------------------------------------------------|-----------|-----------|-----------|-----------|
|                                                                      | A606      | I592      | A604      | I593      |
| Binding of SAPE to 15LOX-2/PEBP1                                     | Y185      | E175      | V179      | E175      |
| Binding of SAPE to 15LOX-2 (Figure 5)                                | N181      | R171      | G175      | R171      |
| Additional tunnel detected by Caver (Figure S1b, green) <sup>3</sup> | S557      | H554      | N555      | N554      |
|                                                                      | E613      | R599      | F611      | R600      |
|                                                                      | Q560      | Q547      | Q558      | Q547      |
|                                                                      | L610      | L596      | L608      | L597      |
| WxxAK motif                                                          | W353-K357 | W340-K344 | W348-K352 | W340-K344 |

<sup>1</sup>In red are highly conserved residues; <sup>2</sup> Current analysis was performed for 15LOX-2. Three other family members are displayed for more information. <sup>3</sup>in addition to the catalytic residues H373, H553 and I676

## References

1. Kobe, M. J.; Neau, D. B.; Mitchell, C. E.; Bartlett, S. G.; Newcomer, M. E., The structure of human 15-lipoxygenase-2 with a substrate mimic. *J. Biol. Chem.* **2014**, 289, (12), 8562-8569.
2. Laskowski, R. A., PDBsum: summaries and analyses of PDB structures. *Nuc. Aci. Res.* **2001**, 29, (1), 221-222.
3. Chovancova, E.; Pavelka, A.; Benes, P.; Strnad, O.; Brezovsky, J.; Kozlikova, B.; Gora, A.; Sustr, V.; Klvana, M.; Medek, P., CAVER 3.0: a tool for the analysis of transport pathways in dynamic protein structures. *PLoS Comput Biol* **2012**, 8, (10), e1002708.
